# Supplementary material for: SFC and CE—A Comparison of Two Orthogonal Methods for the Analysis of Dihydrochalcones in Apple Leaves
Source: MDPI journal article supplement (doi:10.3390/separations10040239), 2023-04-04
Supplement: s1 [file separations-2298385-supplementary.pdf › separations-2298385-supplementary.pdf]

# **SFC and CE – a comparison of two orthogonal methods for the analysis of dihydrochalcones in apple leaves**

## **SUPPLEMENTARY INFORMATION**

Michael J. Zwerger, Sarah Contratti, Valentina Mariano and Markus Ganzera \*

### **Affiliation**

Institute of Pharmacy, Pharmacognosy, University of Innsbruck, Innsbruck, Austria

### **Correspondence**

Assoc. Prof. Dr. Markus Ganzera, Institute of Pharmacy, Pharmacognosy,  
University of Innsbruck, Innrain 80-82, 6020 Innsbruck, Austria. E-mail:  
markus.ganzera@uibk.ac.at; Phone: +43 512 507 58406; Fax: +43 512 507 58499

## 1. SFC method development

### 1.1. Stationary phase

**Table S1.** Stationary phases evaluated in this study.

| Column                     | Dimensions    | Particle size |
|----------------------------|---------------|---------------|
| <b>Viridis® BEH 2-EP</b>   | 3 mm x 100 mm | 1.7 µm        |
| <b>Viridis® BEH</b>        | 3 mm x 100 mm | 1.7 µm        |
| <b>Viridis® HSS C18 SB</b> | 3 mm x 100 mm | 1.8 µm        |
| <b>Torus™ 1-AA</b>         | 3 mm x 100 mm | 1.7 µm        |
| <b>Torus™ DIOL</b>         | 3 mm x 100 mm | 1.7 µm        |
| <b>Torus™ DEA</b>          | 3 mm x 100 mm | 1.7 µm        |

## 1.2. Influence of individual SFC parameters on the separation

### Stationary phase

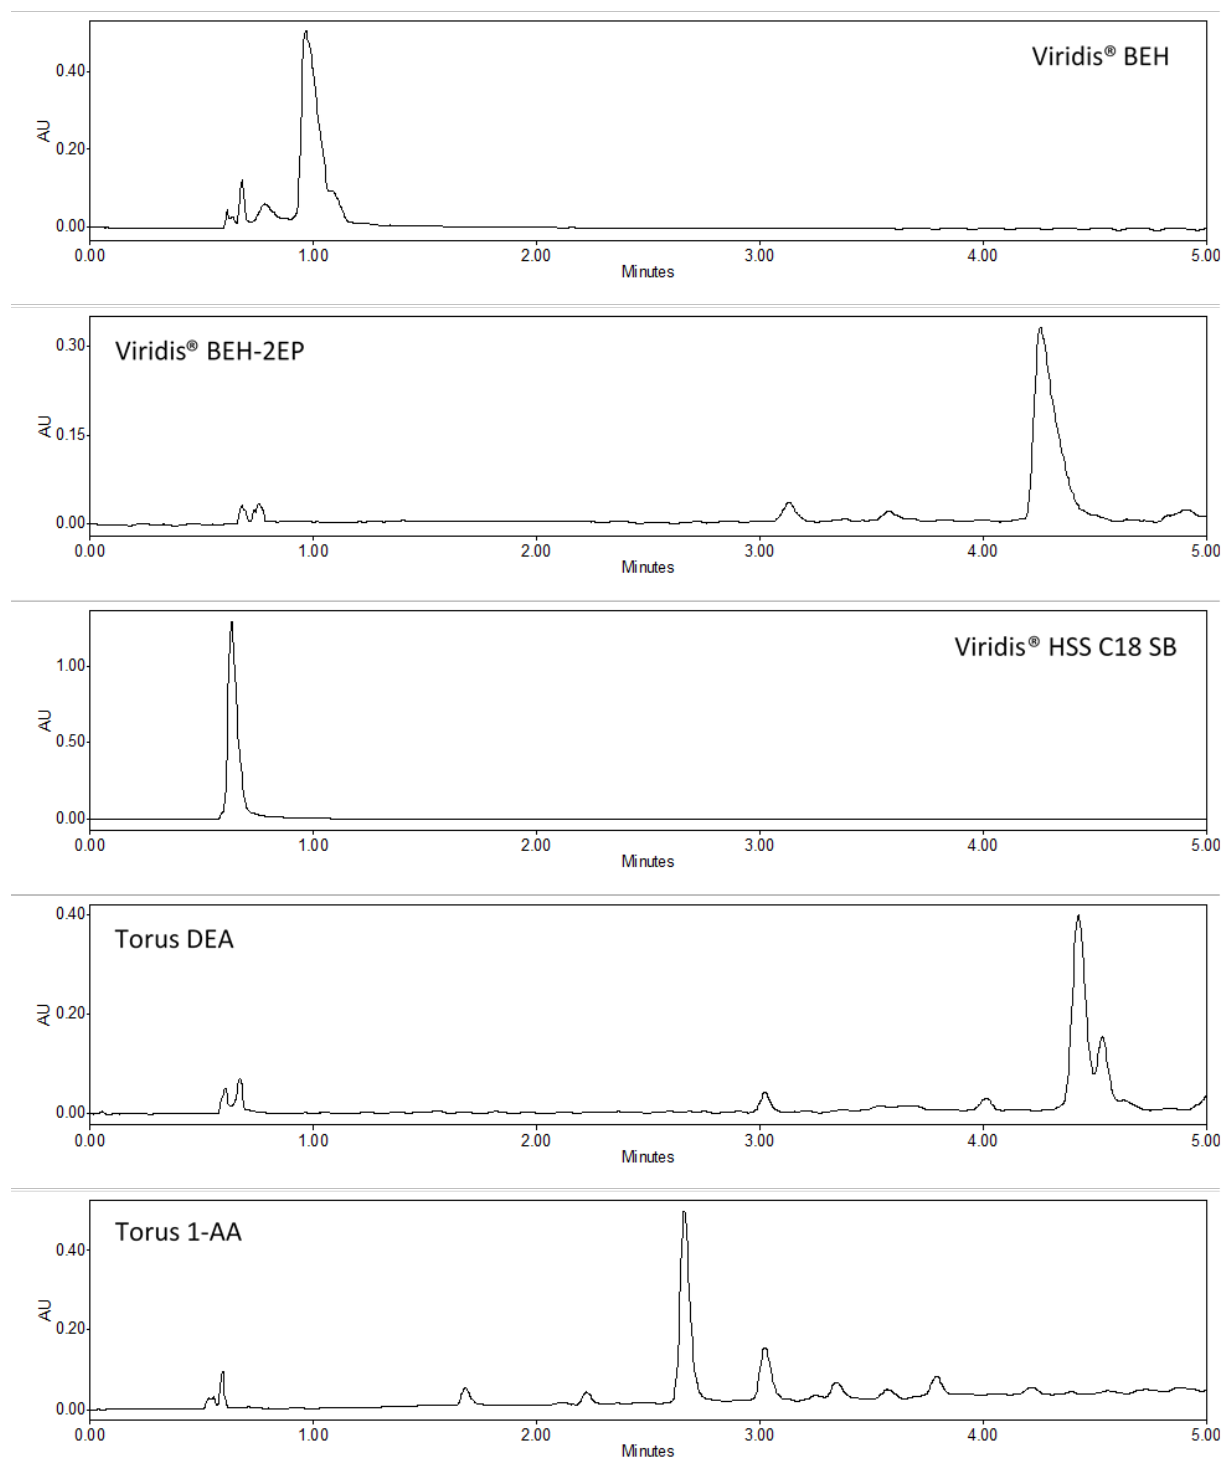

**Figure S1.** Impact of stationary phase on the separation of the test solution; other settings were optimal.

## Modifier and Additives

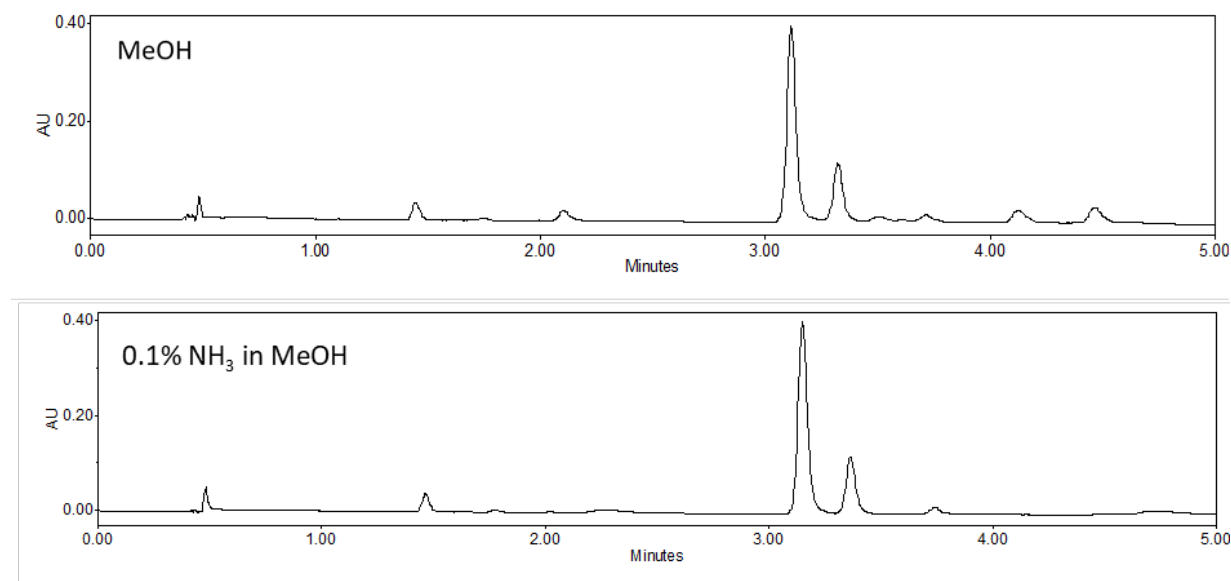

**Figure S2.** Impact of methanol and methanol with ammonia as modifier on the separation of the test solution; other settings were optimal.

## Temperature

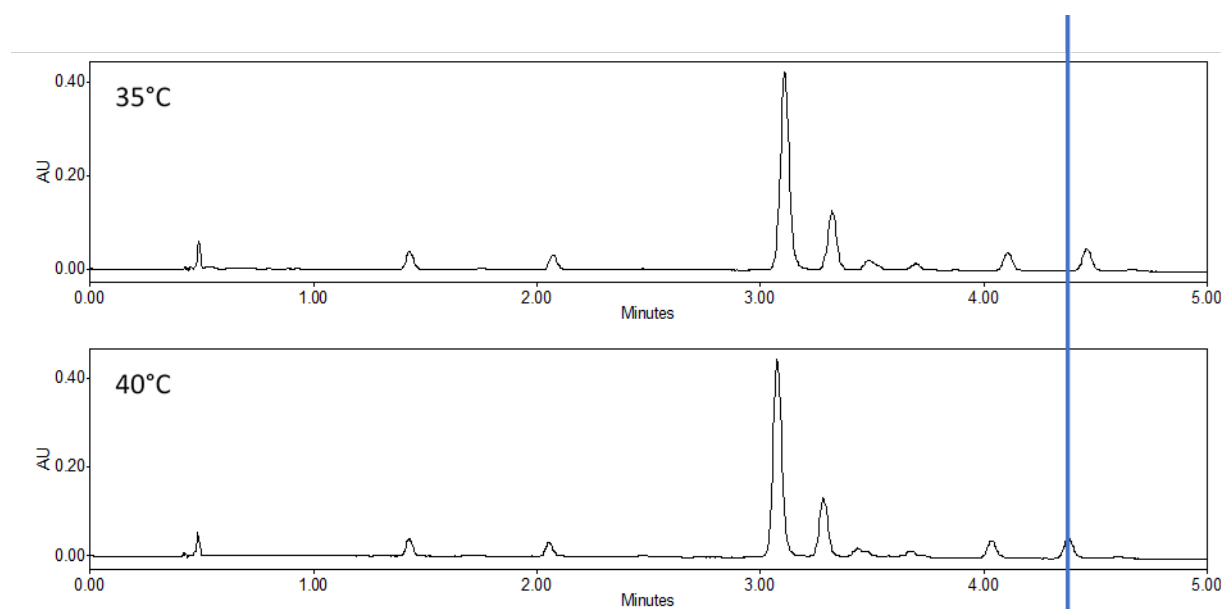

**Figure S3.** Impact of temperature on the separation of the test solution; other settings were optimal.

### Flow rate

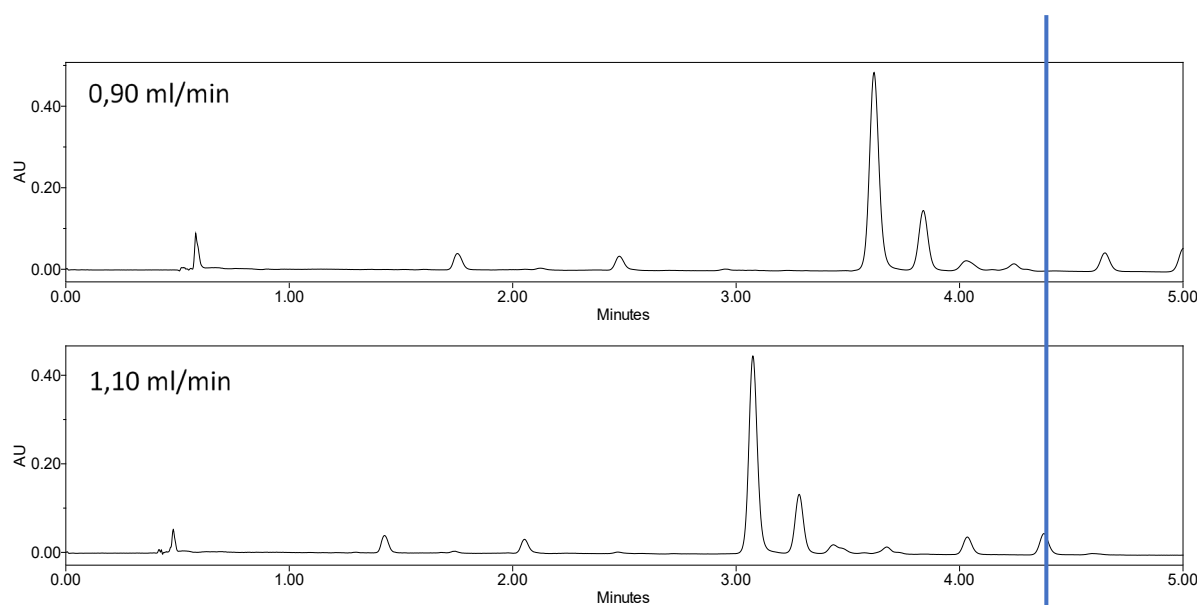

**Figure S4.** Impact of different flow rates on the separation of the test solution; other settings were optimal.

### ABPR

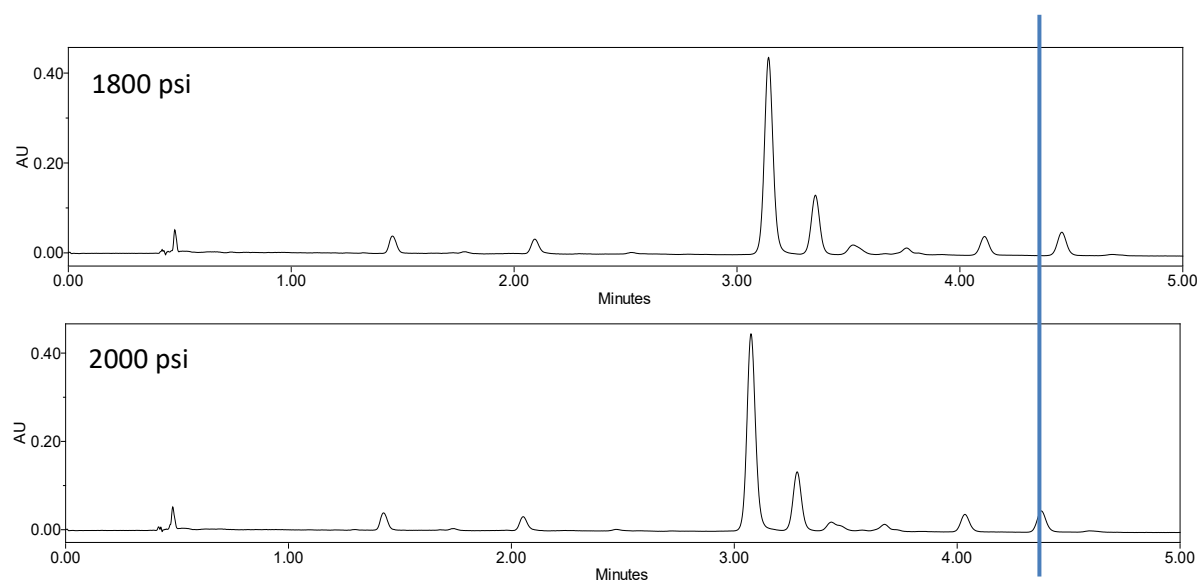

**Figure S5.** Impact of backpressure on the separation of the test solution; other settings were optimal.

## Gradient

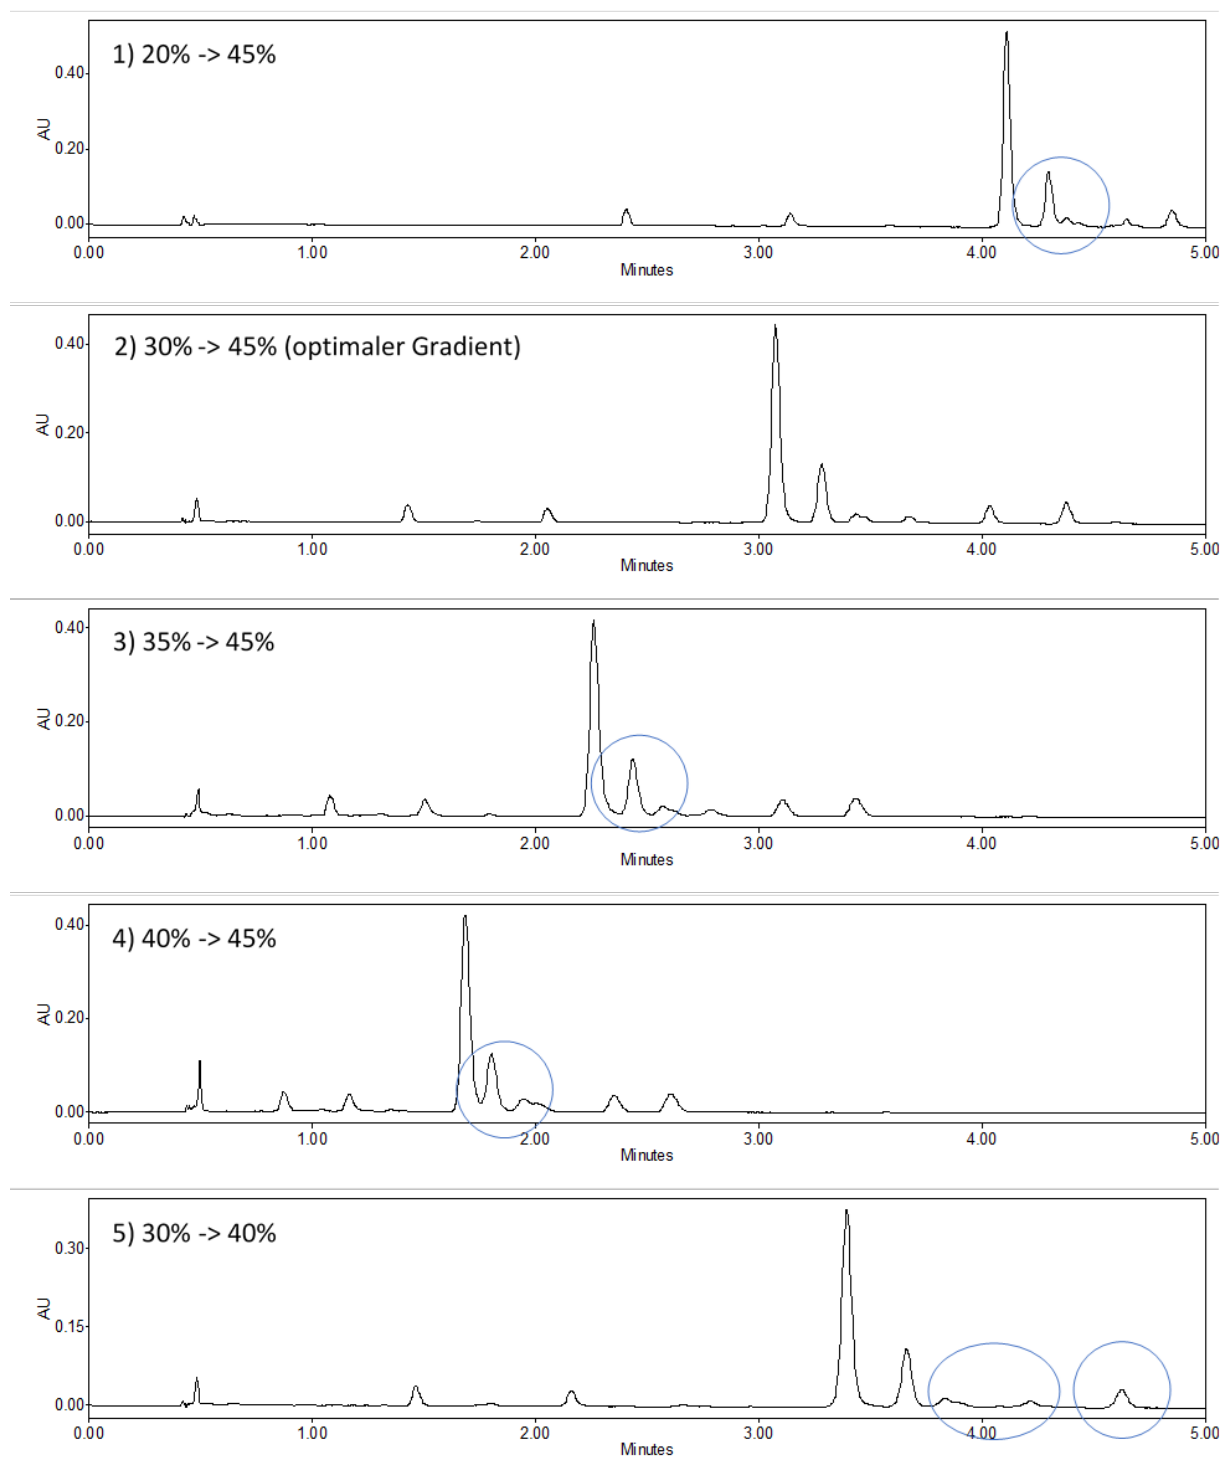

**Figure S6.** Impact of the gradient on the separation of the test solution; other settings were optimal

## 2. CE

### Phosphate Buffer

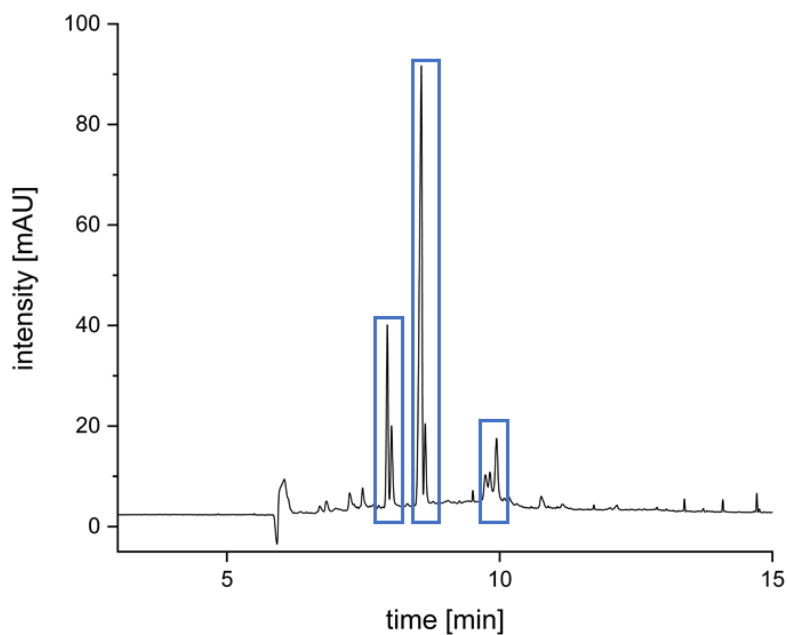

**Figure S7.** Separation of the test solution with a phosphate buffer of pH 8.50. Severe coelution (marked in blue) can be observed concerning all target DHCs.

### pH-Value

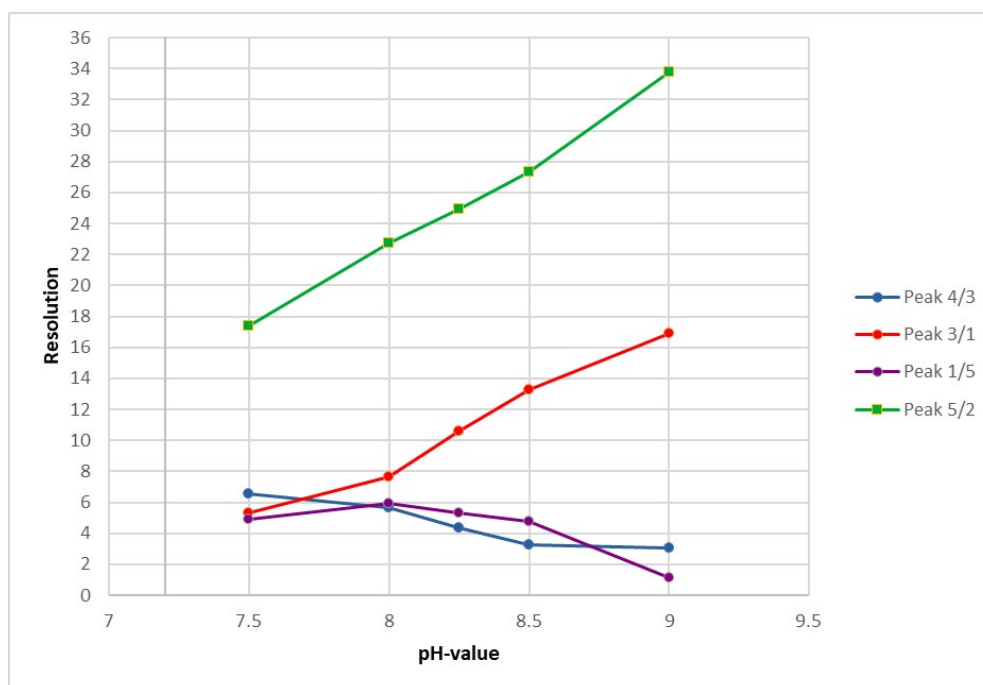

**Figure S8.** Resolution of the target analytes at different pH values (all borate buffers).

## Voltage

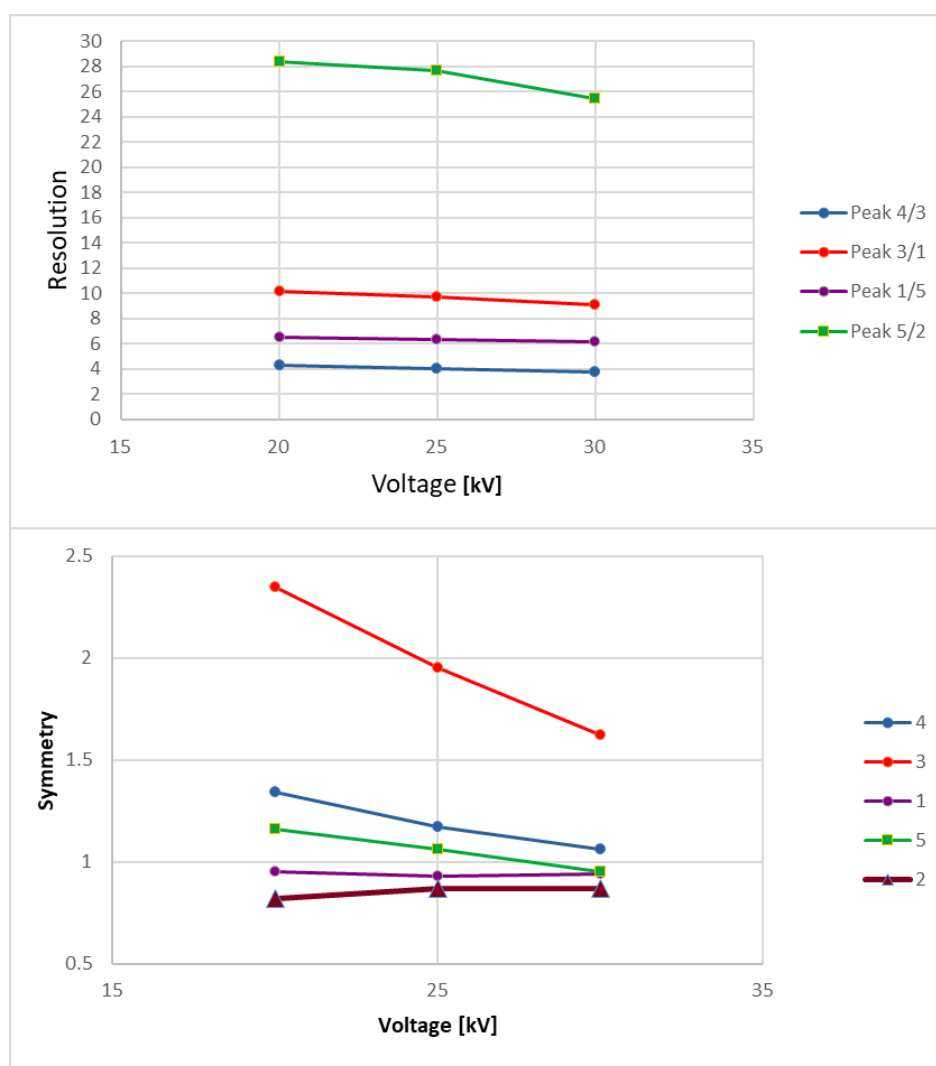

**Figure S9.** Resolution and peak symmetry of the target analytes at different voltages.



## Temperature

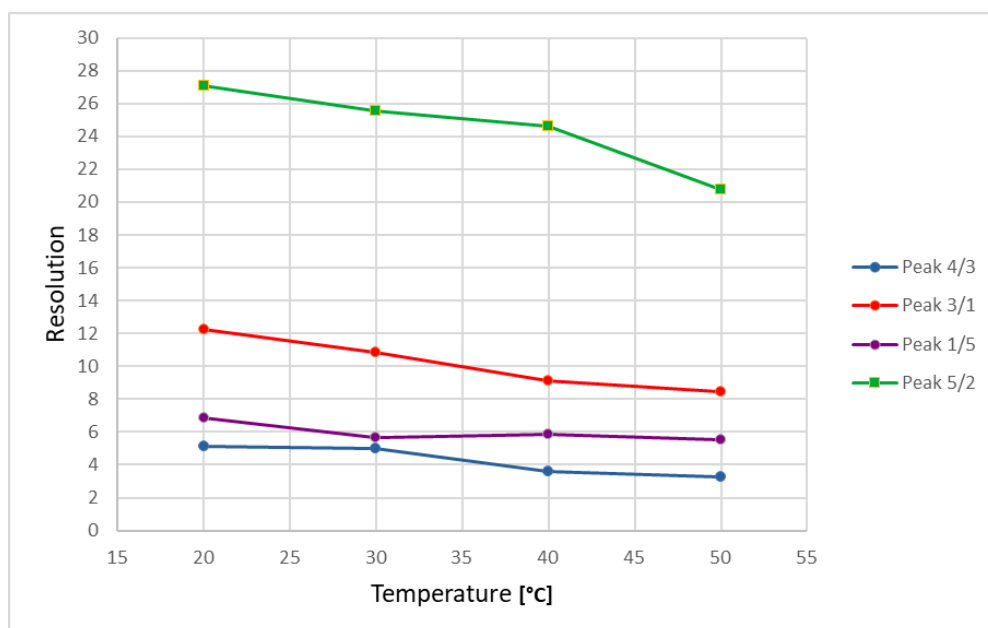

**Figure S10.** Resolution of the target analytes at different temperatures.

## Organic additives

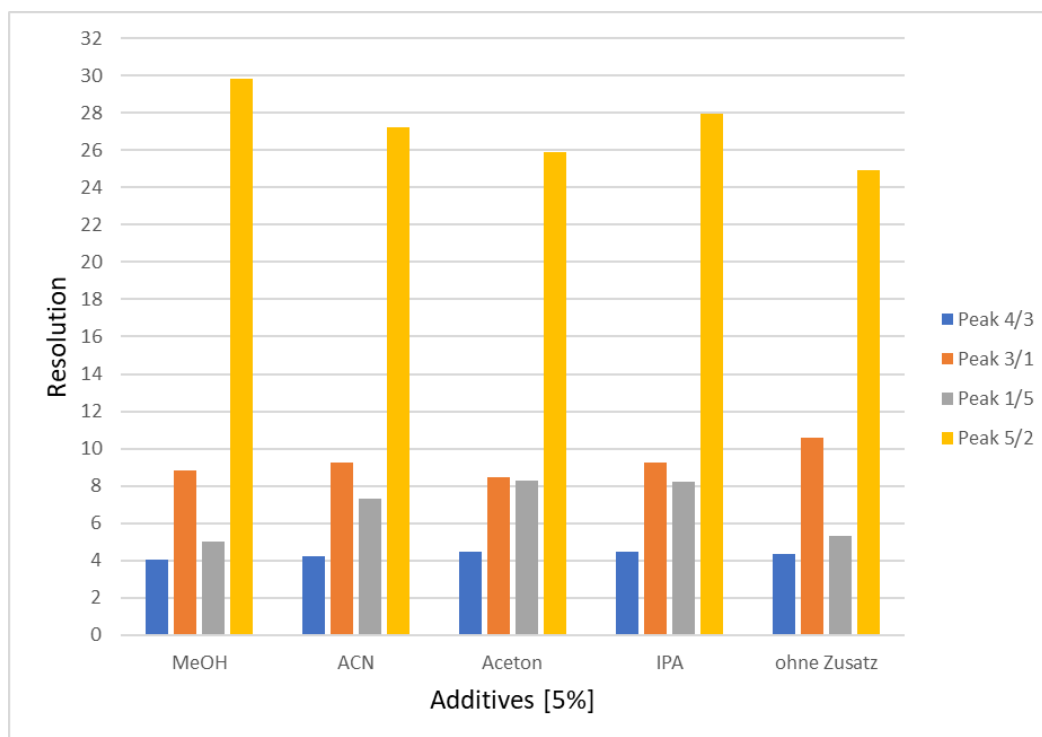

**Figure S11.** Resolution of the target analytes using different organic additives.

### 3. UV-spectra of the DHCs

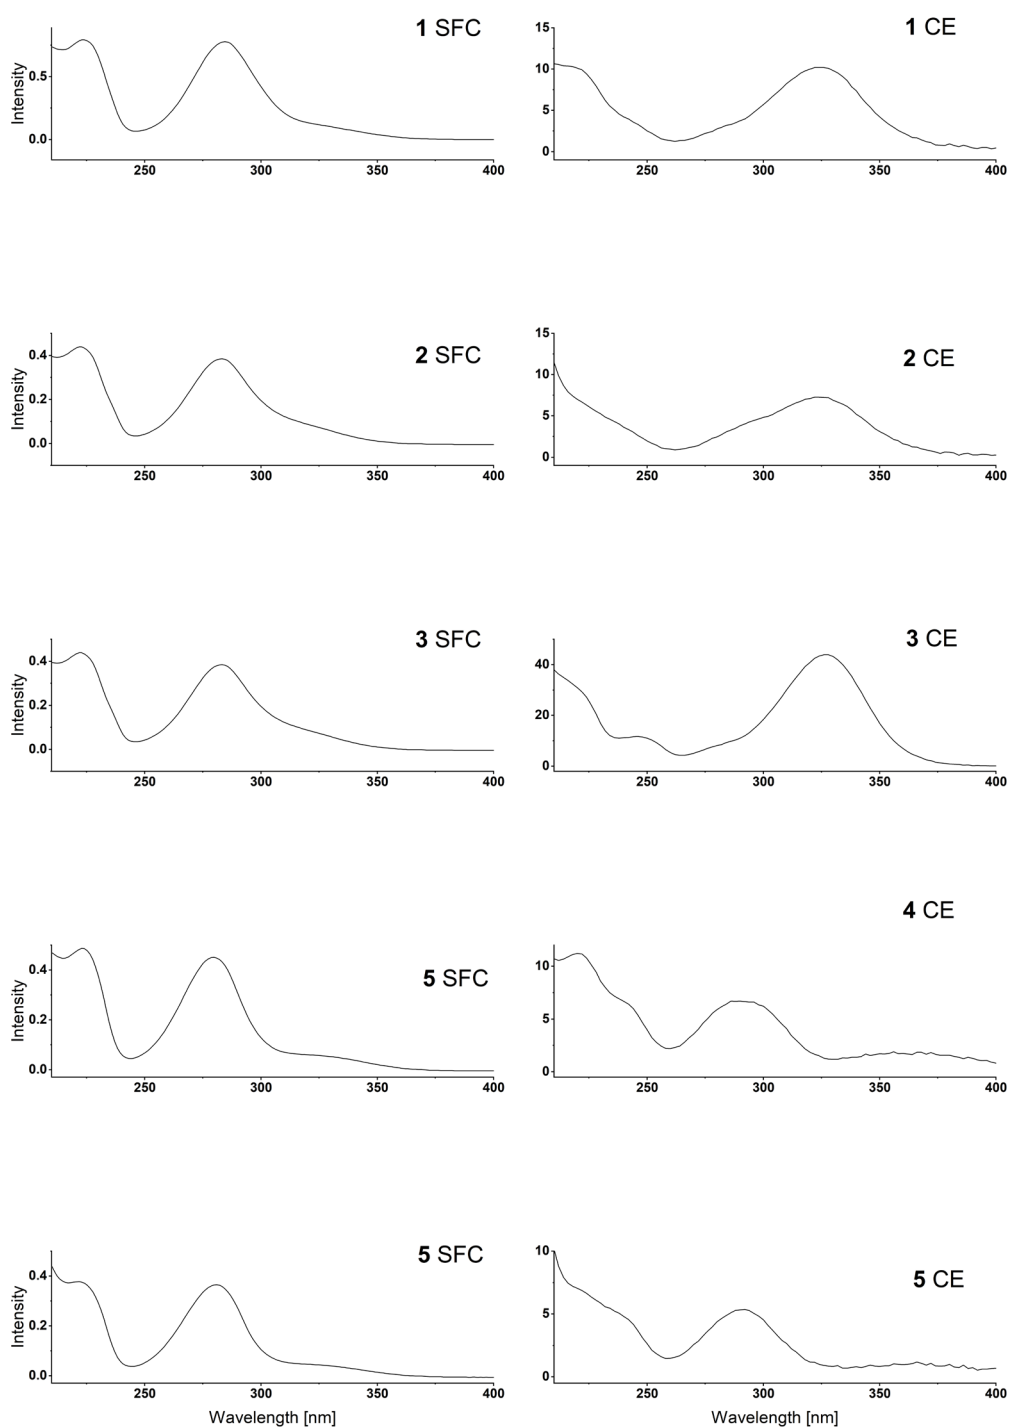

**Figure S12.** UV-spectra of the 5 DHCs in comparison, as determined in sample solutions (concentrations of compounds not identical); left: SFC, right: CE.

#### 4. Analysis of the samples using SFC

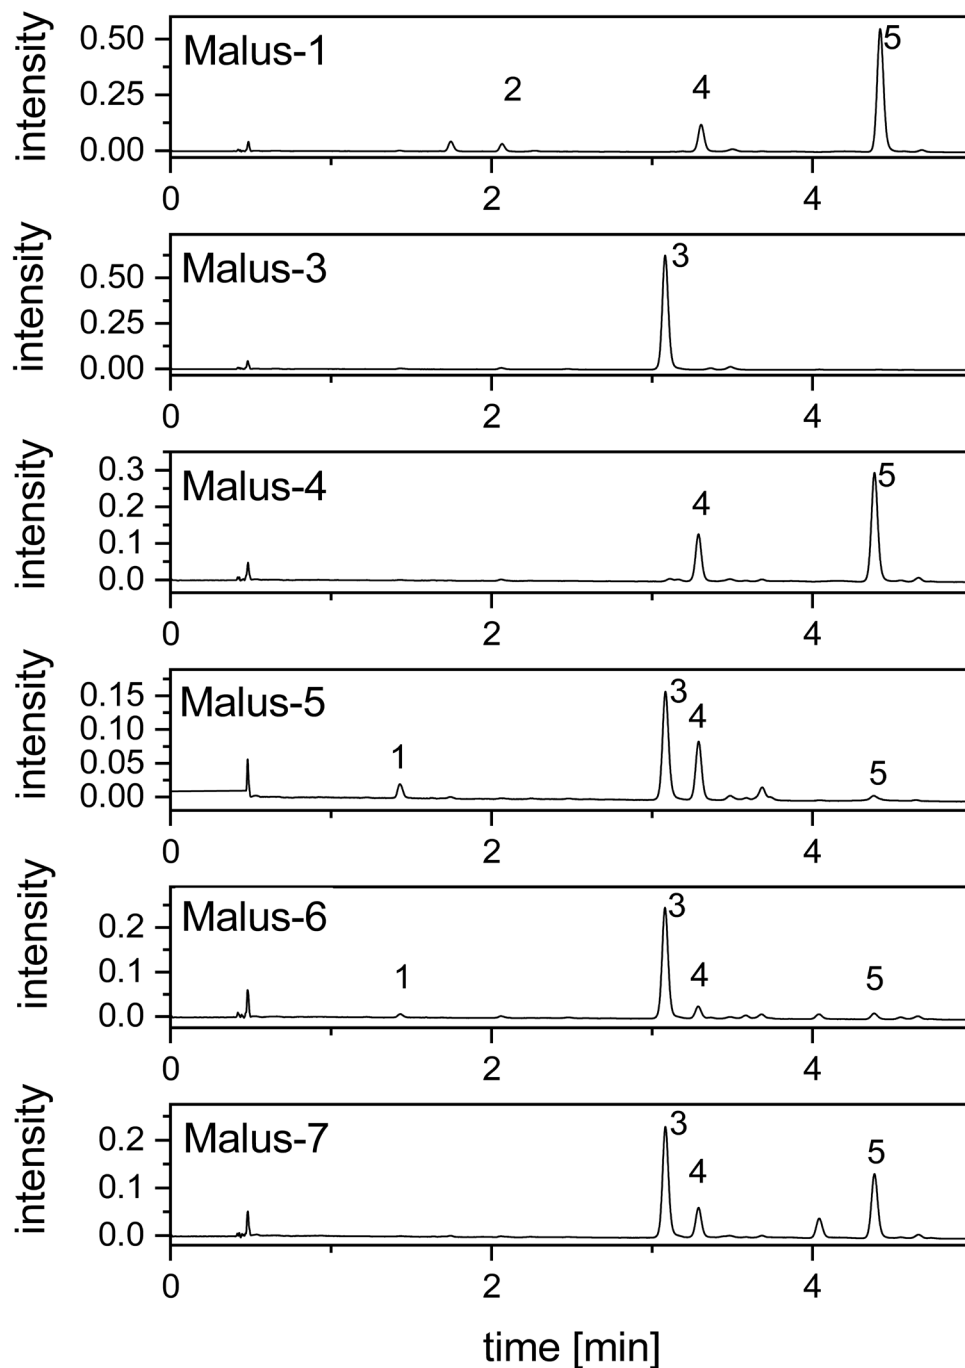

**Figure S13.** SFC chromatograms of the analyzed samples not shown in the manuscript under optimized conditions.

## 5. Analysis of the samples using CE

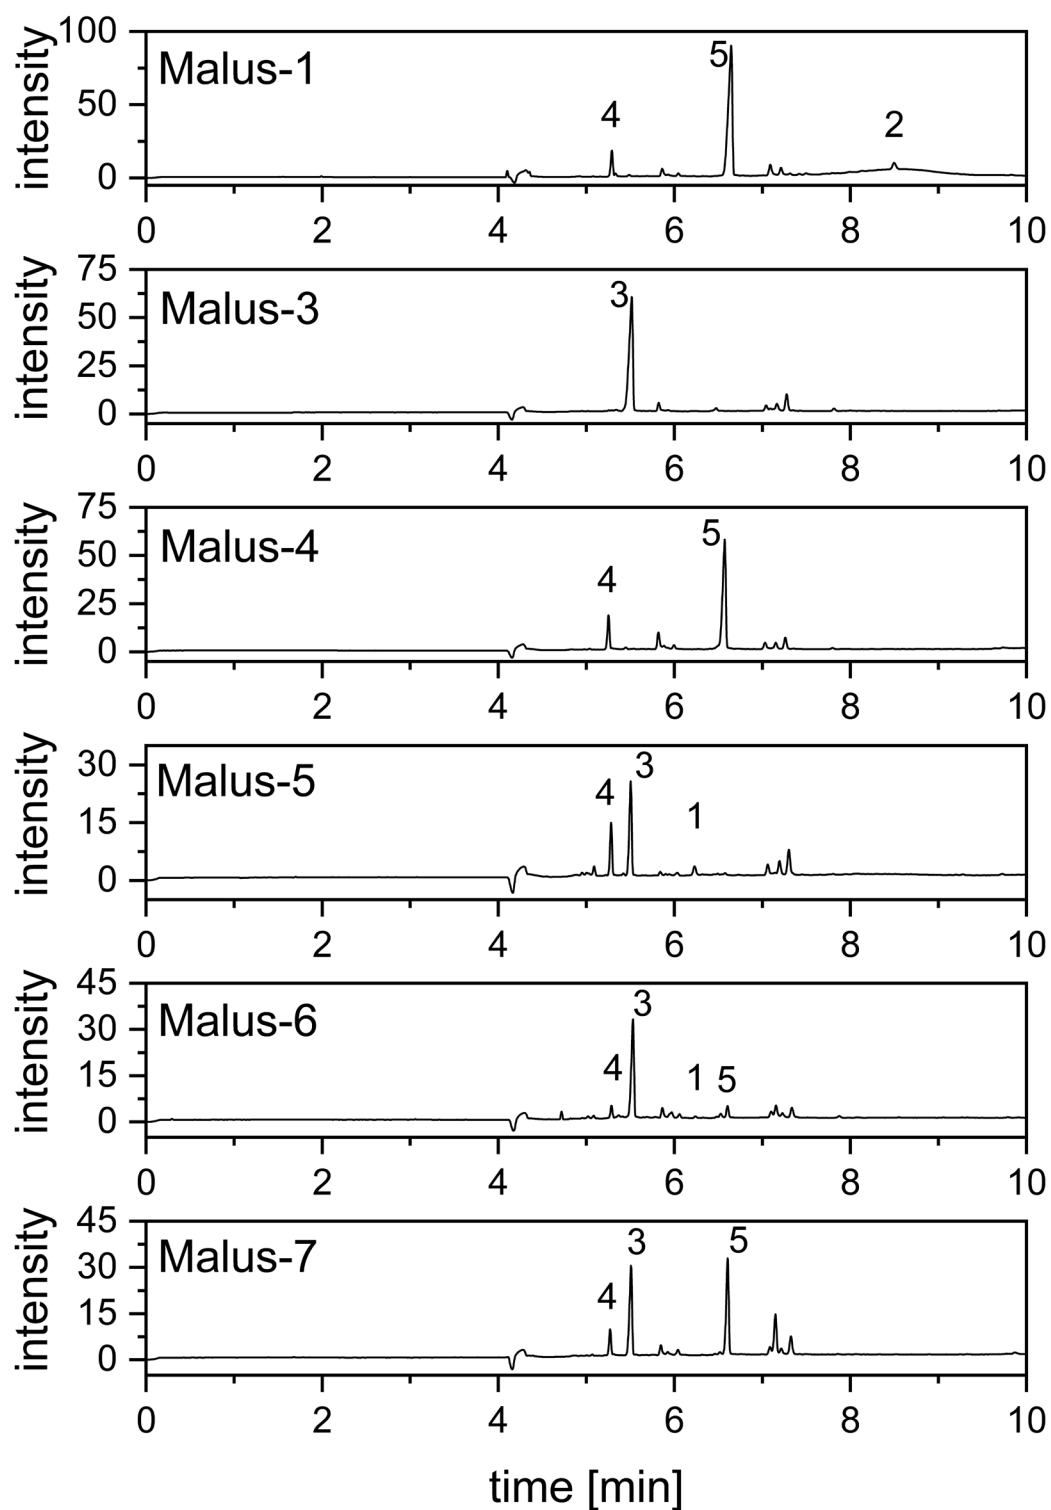

**Figure S14.** CE electropherograms of the analyzed samples not shown in the manuscript under optimized conditions.

## 6. Statistical evaluation

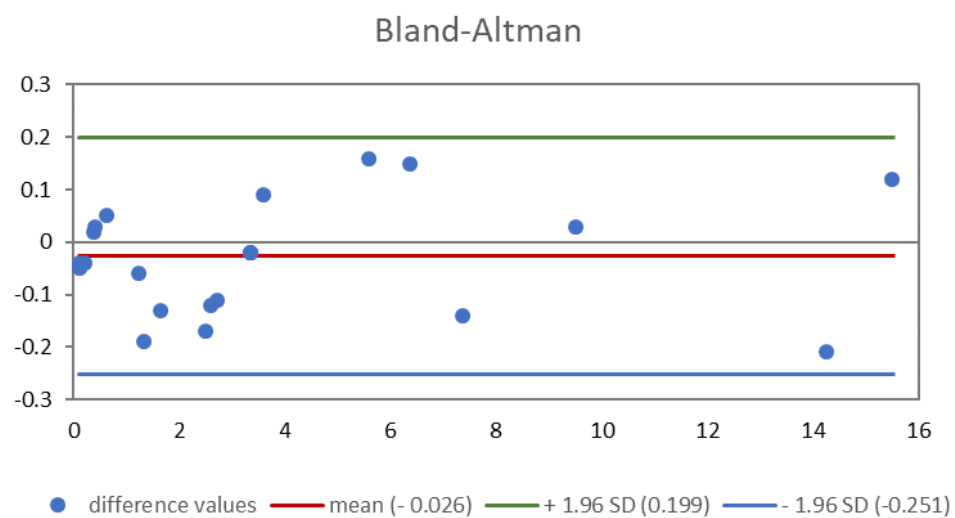

**Figure S15.** Statistical method comparison using a Bland-Altman plot.

## 7. Selection of samples

**Table S2.** Detailed information on the samples analyzed in this study.

| Sample         | Species                  | Tree ID | Provenance                                         | Time of harvest |
|----------------|--------------------------|---------|----------------------------------------------------|-----------------|
| <b>Malus-1</b> | <i>Malus micromalus</i>  | 31      | Fondazione Edmund Mach -<br>San Michele all' Adige | August 28, 2017 |
| <b>Malus-2</b> | <i>Malus prunifolia</i>  | 60      | Fondazione Edmund Mach -<br>San Michele all' Adige | August 28, 2017 |
| <b>Malus-3</b> | <i>Malus huphensis</i>   | 131     | Fondazione Edmund Mach -<br>San Michele all' Adige | August 28, 2017 |
| <b>Malus-4</b> | <i>Malus toringo</i>     | 136     | Fondazione Edmund Mach -<br>San Michele all' Adige | August 28, 2017 |
| <b>Malus-5</b> | <i>Malus baccata</i>     | 189     | Fondazione Edmund Mach -<br>San Michele all' Adige | August 28, 2017 |
| <b>Malus-6</b> | <i>Malus sikkimensis</i> | 246     | Fondazione Edmund Mach -<br>San Michele all' Adige | August, 2022    |
| <b>Malus-7</b> | <i>Malus floribunda</i>  | 279     | Fondazione Edmund Mach -<br>San Michele all' Adige | August 28, 2017 |
